# Supplementary material for: Activation of a CH bond in polypyridine systems by acetyl hypofluorite made from F2
Source: Royal Society of Chemistry journal article supplement (doi:10.1039/c2ob06799d), 2011-12-07
Supplement: c2ob06799d.pdf [file c2ob06799d.pdf]

## Supporting Information to Accompany:

### Activation of a CH bond in polypyridine systems by acetyl hypofluorite made from F<sub>2</sub>

Julia Gatenyo, Youlia Hagooly, Inna Vints and Shlomo Rozen\*

*School of Chemistry, Tel-Aviv University, Tel-Aviv 69978, Israel*

Tel: 972-3-6408378; Fax: 972-3-6409293

[rozens@post.tau.ac.il](mailto:rozens@post.tau.ac.il)

#### **Table of Contents**

|                                                      |         |
|------------------------------------------------------|---------|
| Copies of <sup>1</sup> H and <sup>13</sup> C Spectra | S2-S15  |
| DFT Calculations                                     | S16-S27 |

## Proton and carbon NMR spectra

### 2-Pyridyl-6-acetoxypyridine (2) $^1\text{H}$ NMR

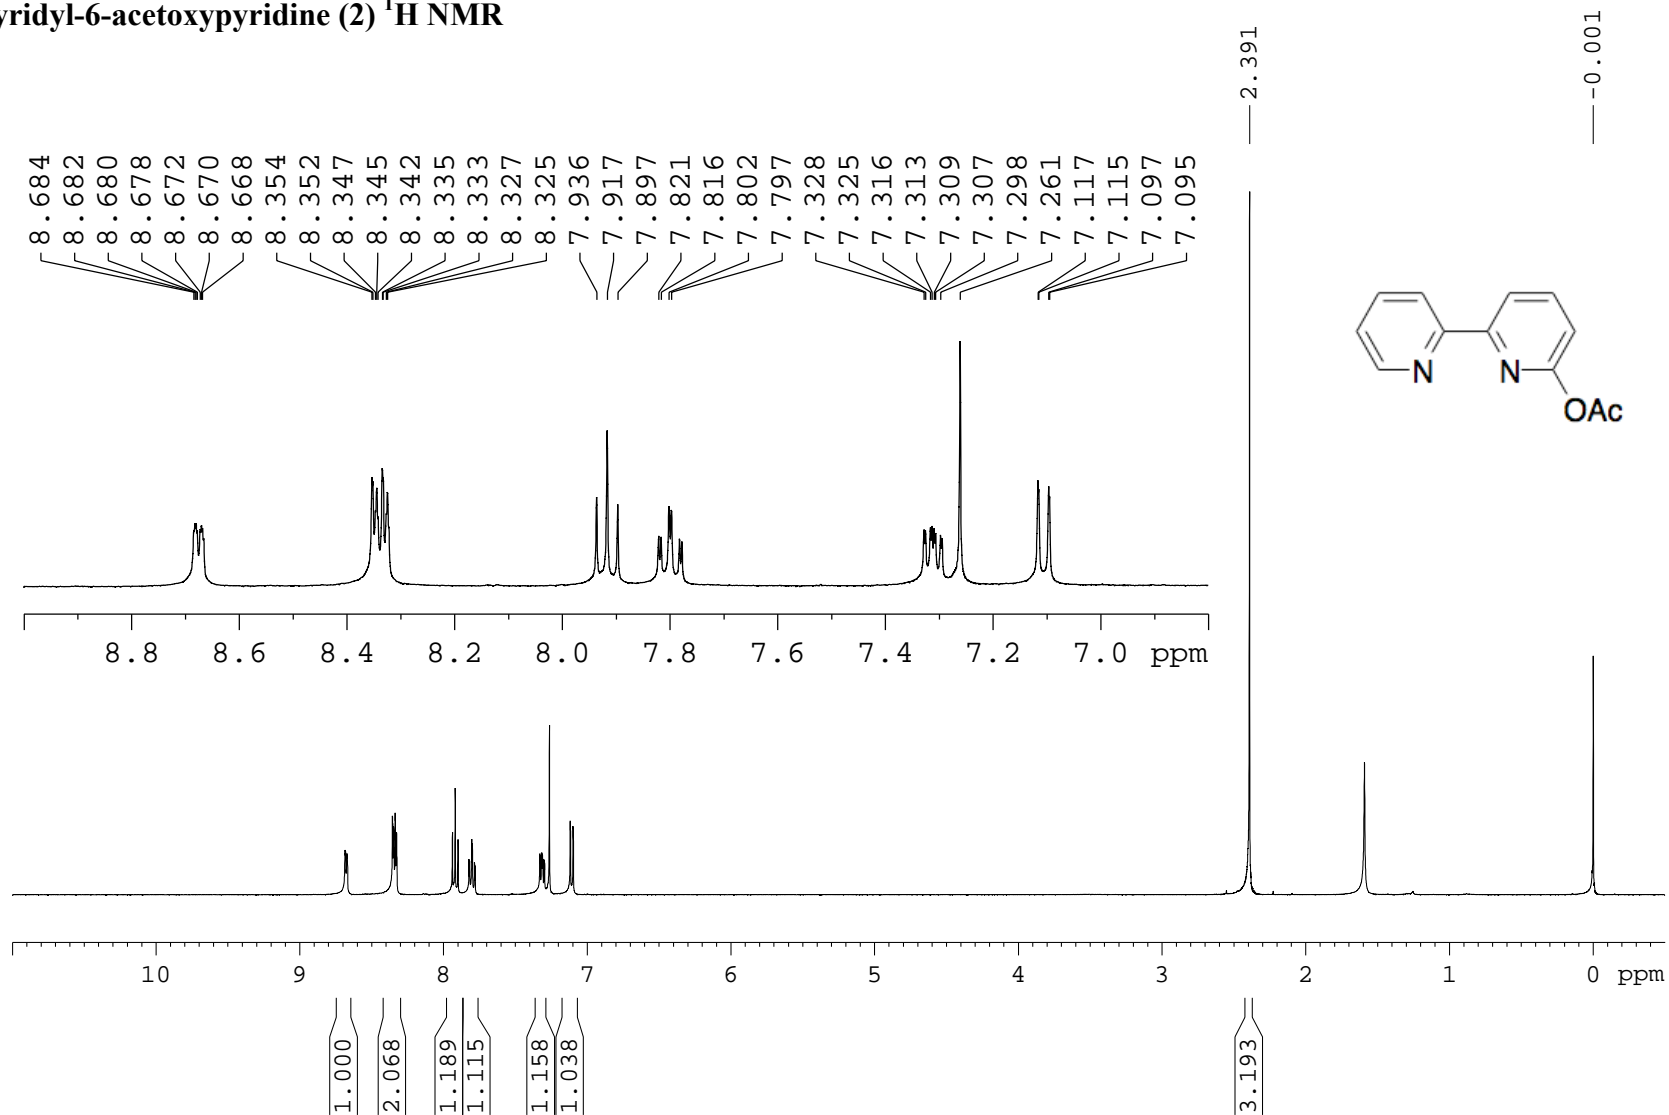

## 2-Pyridyl-6-acetoxypyridine (2) $^{13}\text{C}$ NMR

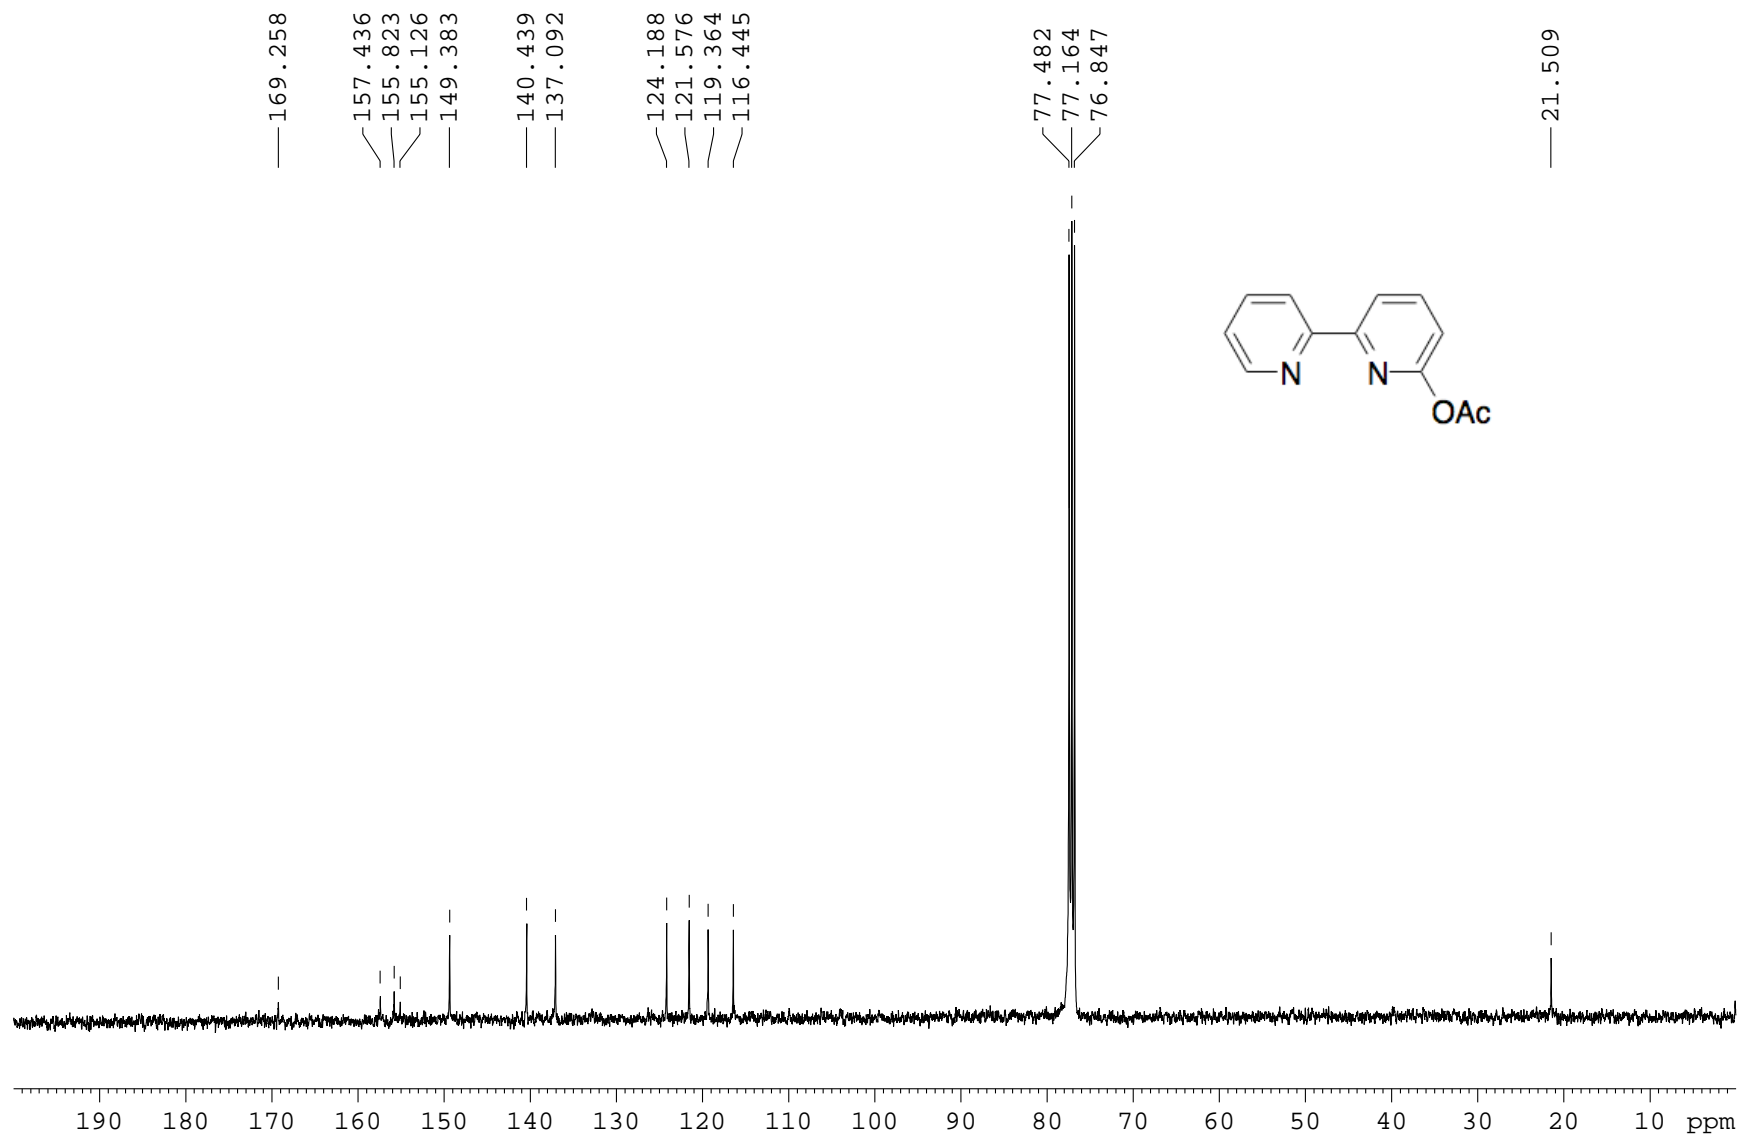

### 6,6'-Diacetoxy-5,5'-dimethyl-2,2'-bipyridyl (5) <sup>1</sup>H NMR

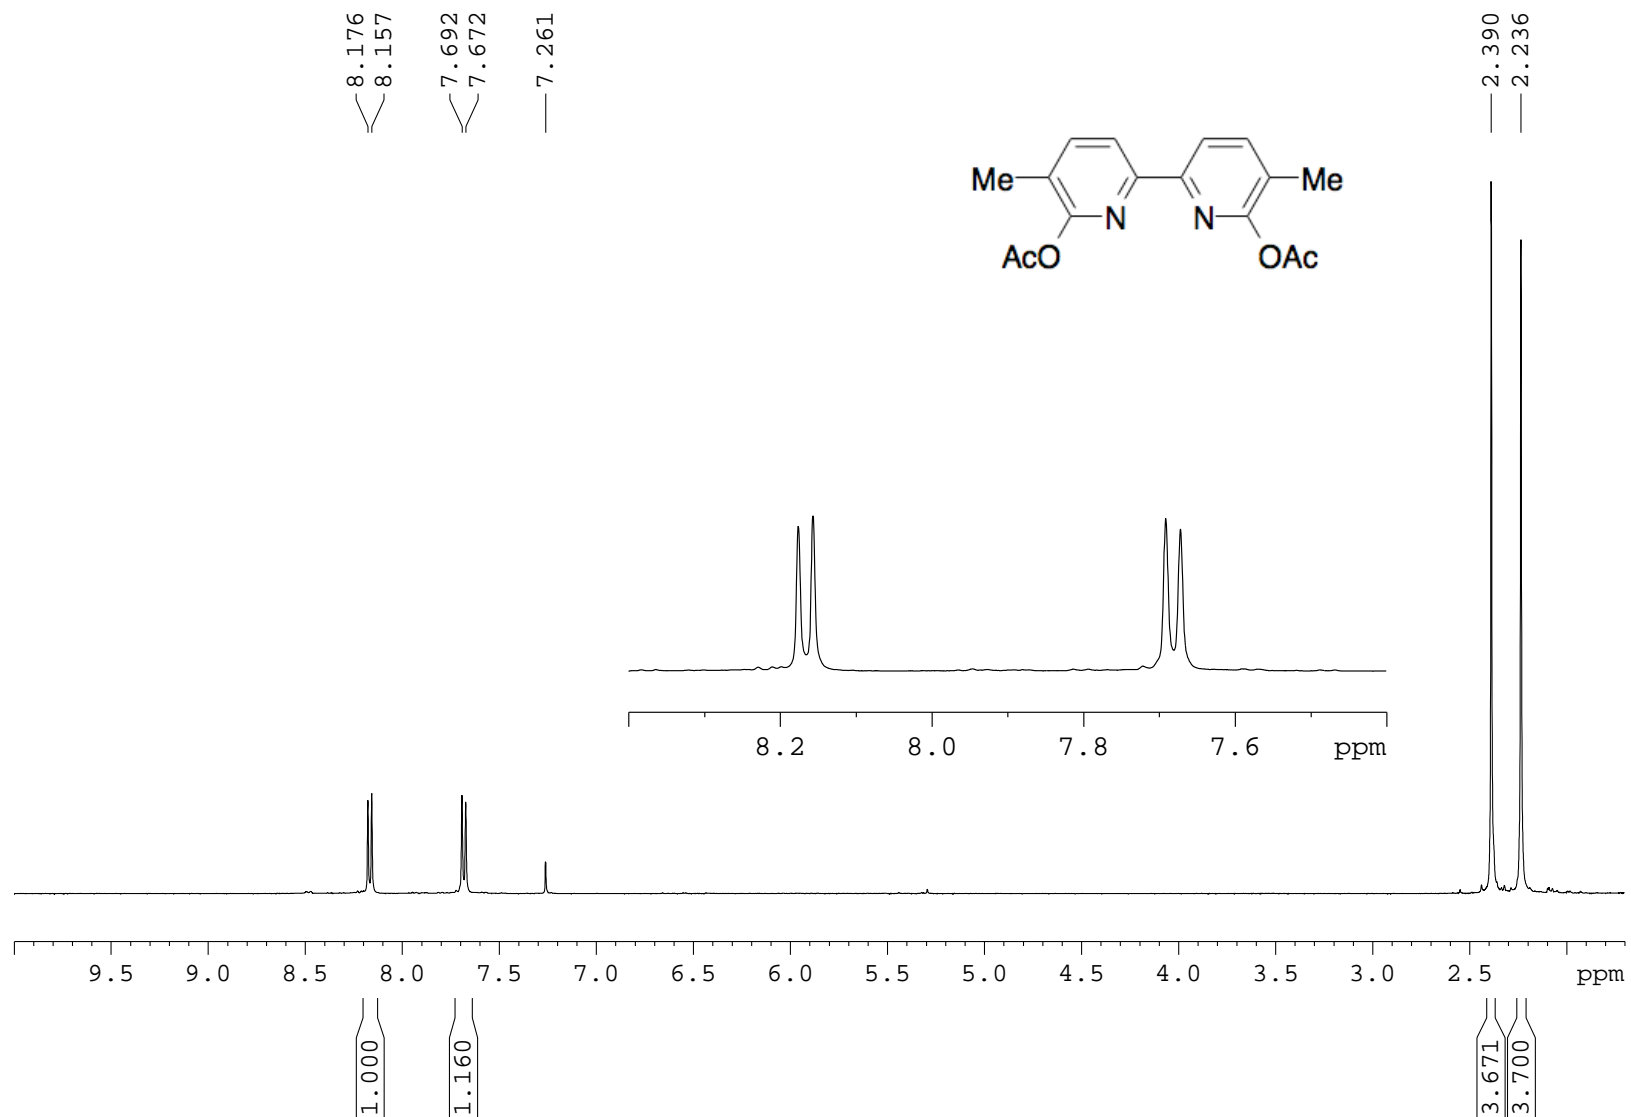

### 6,6'-Diacetoxy-5,5'-dimethyl-2,2'-bipyridyl (5) $^{13}\text{C}$ NMR

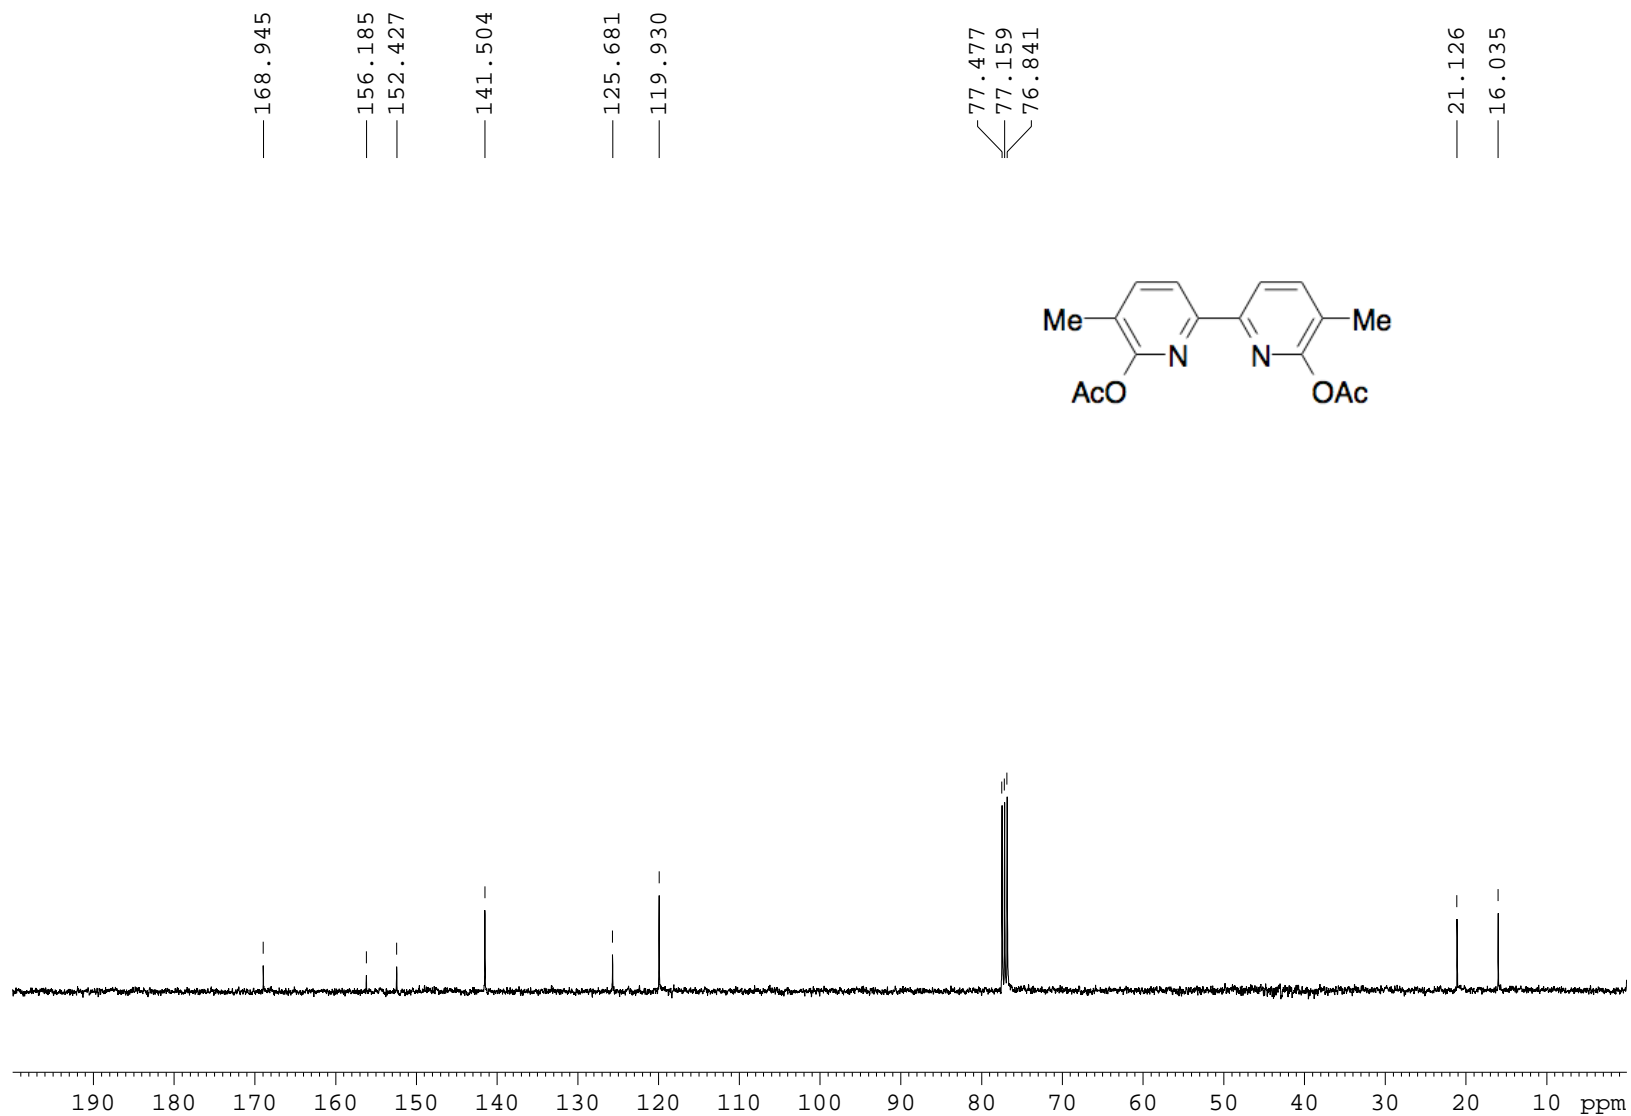

### 2,2'-Diacetoxy-4,4'-bipyridyl (7) <sup>1</sup>H NMR

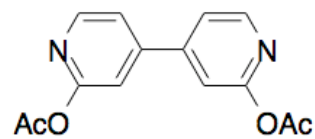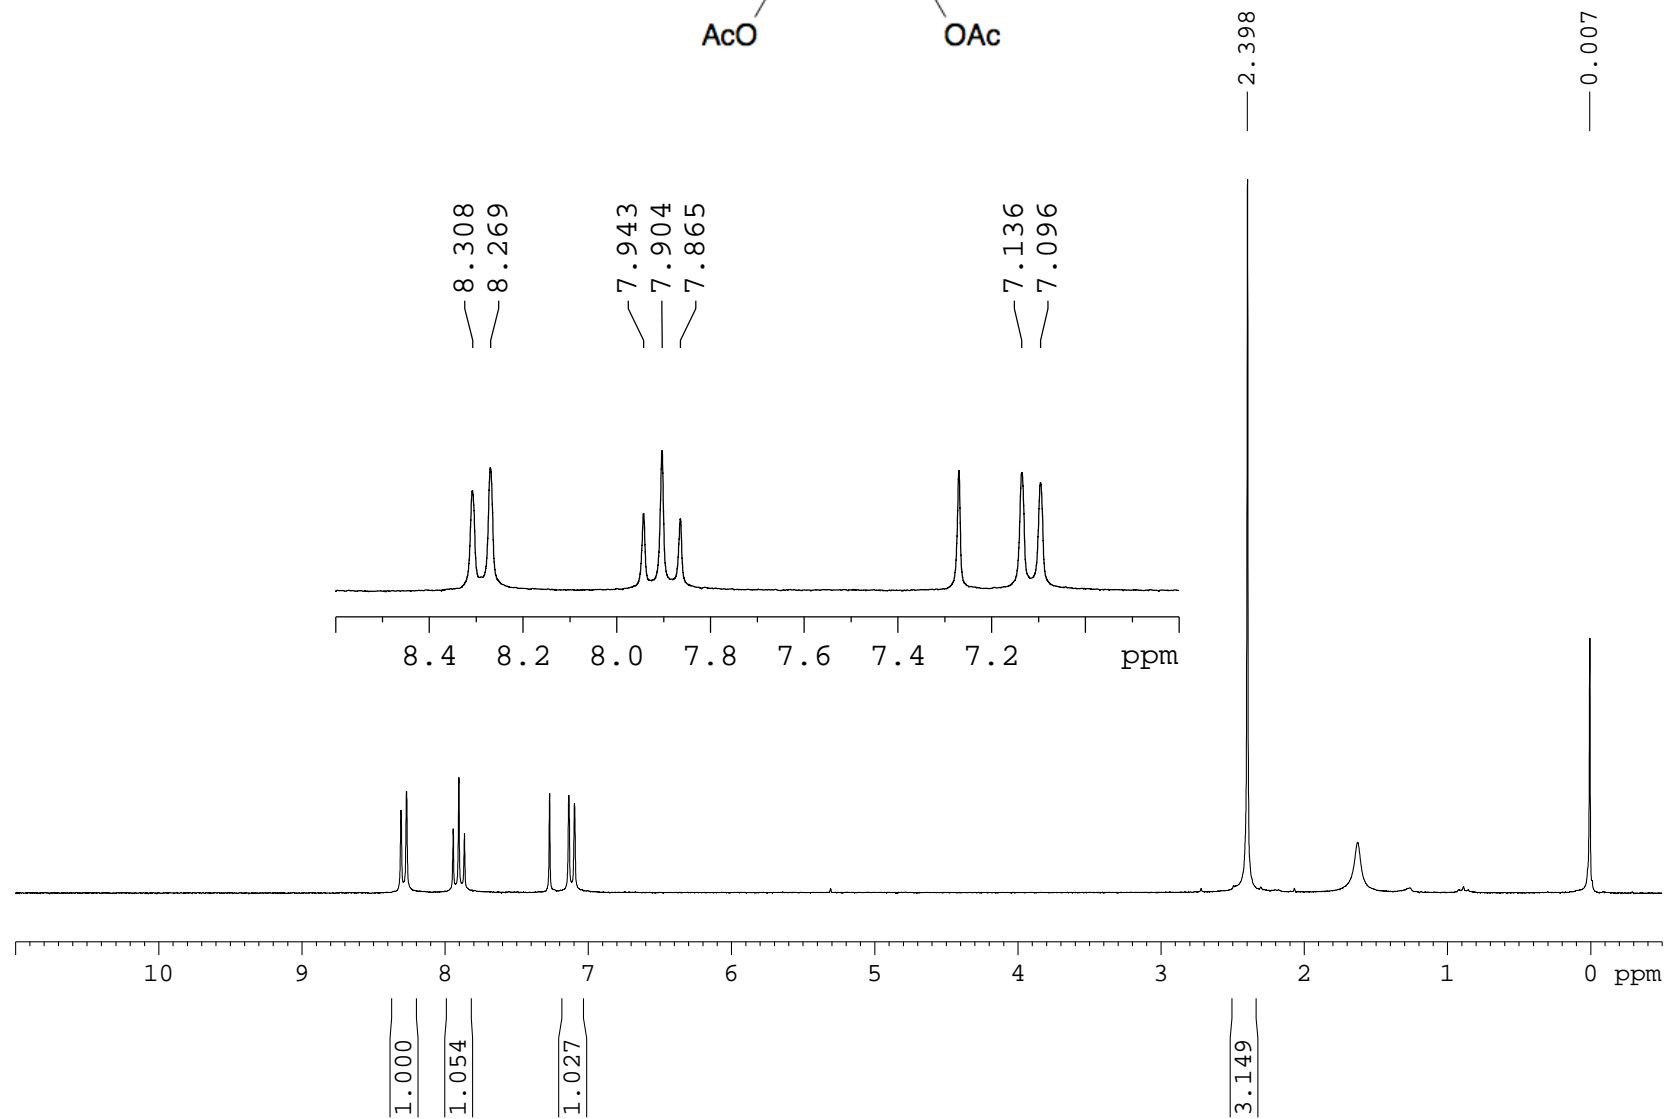

### 2,2'-Diacetoxy-4,4'-bipyridyl (7) $^{13}\text{C}$ NMR

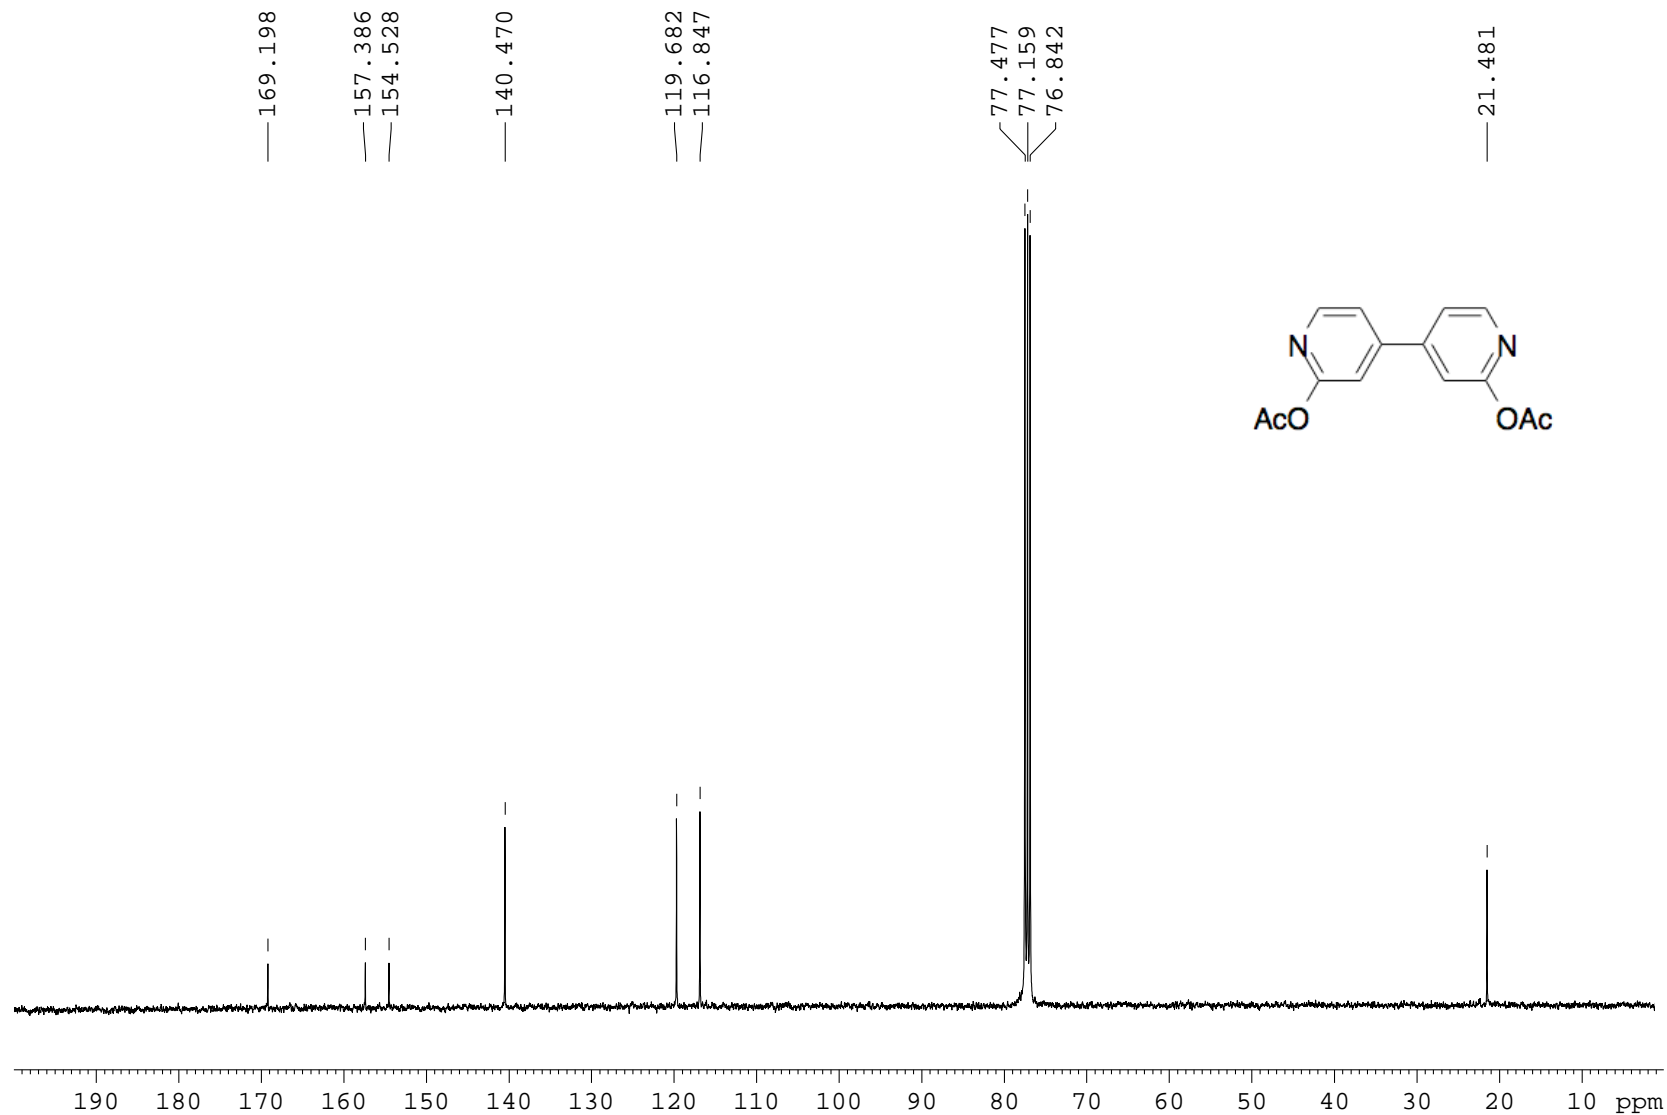

### 4,7-Dimethyl-1,10-phenanthrolin-2(1H)-one (12) <sup>1</sup>H NMR

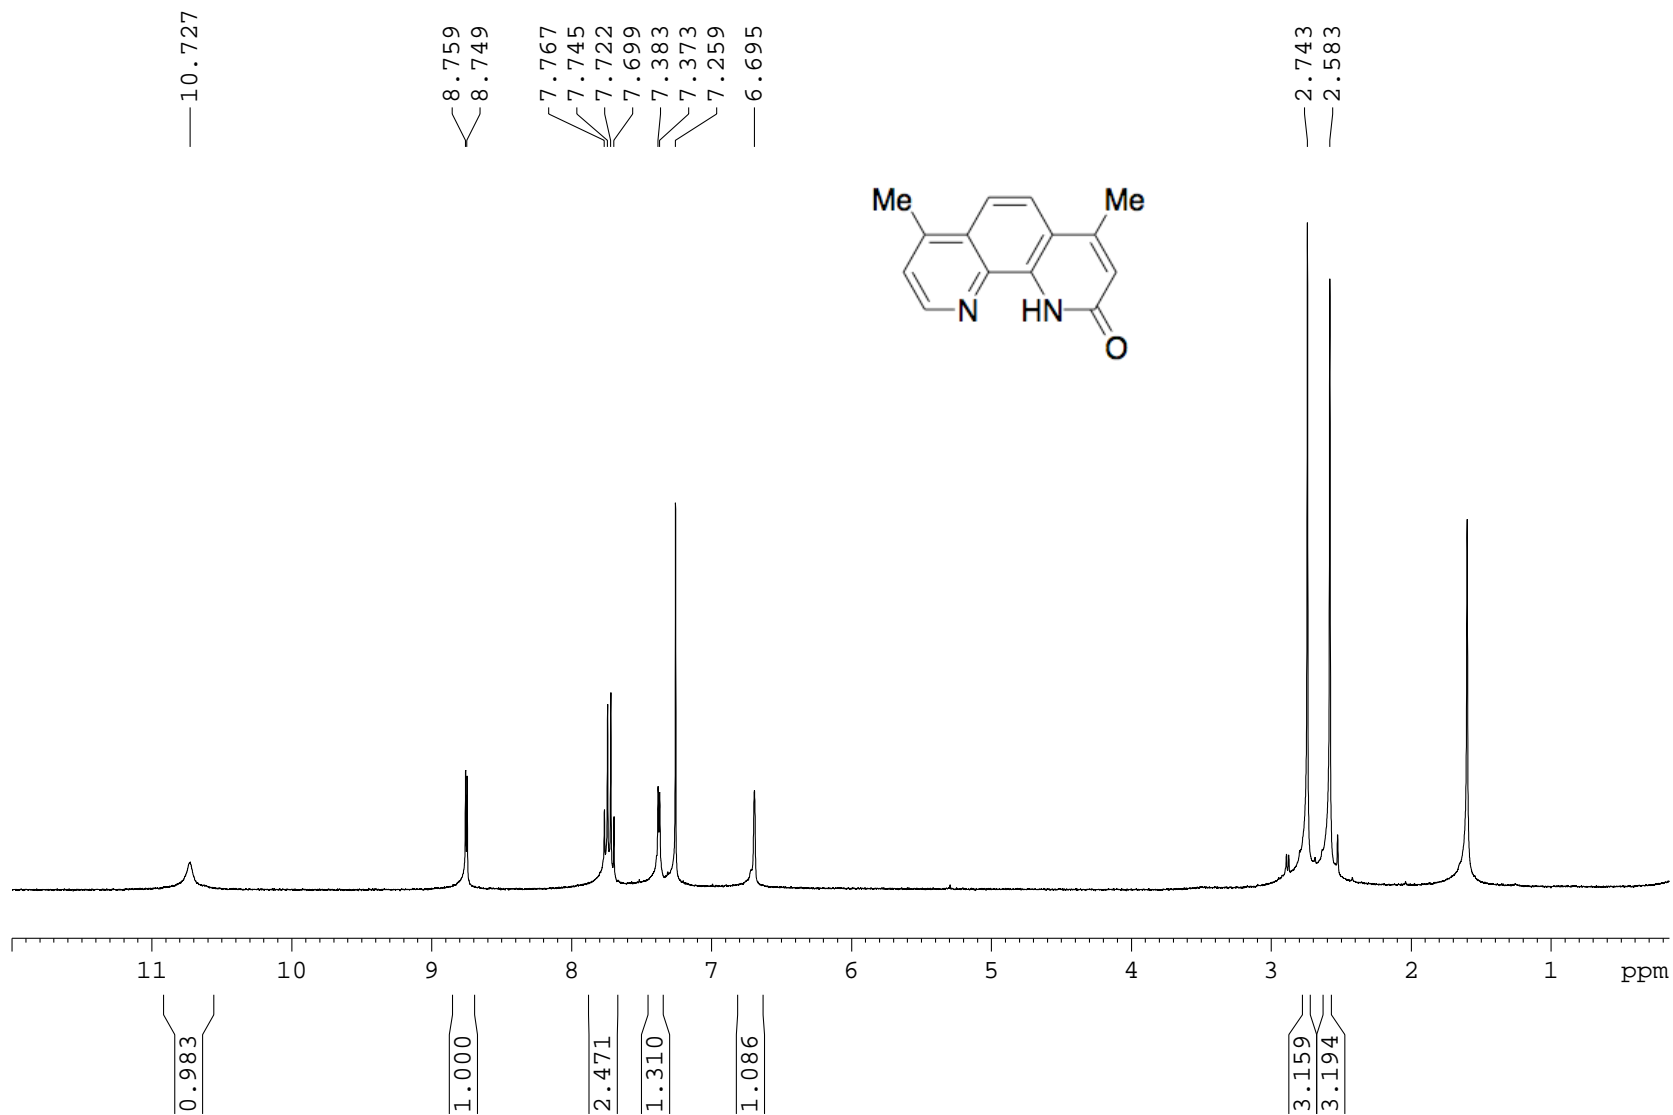



### 4,7-Dimethyl-1,10-phenanthrolin-2(1H)-one (12) $^{13}\text{C}$ NMR

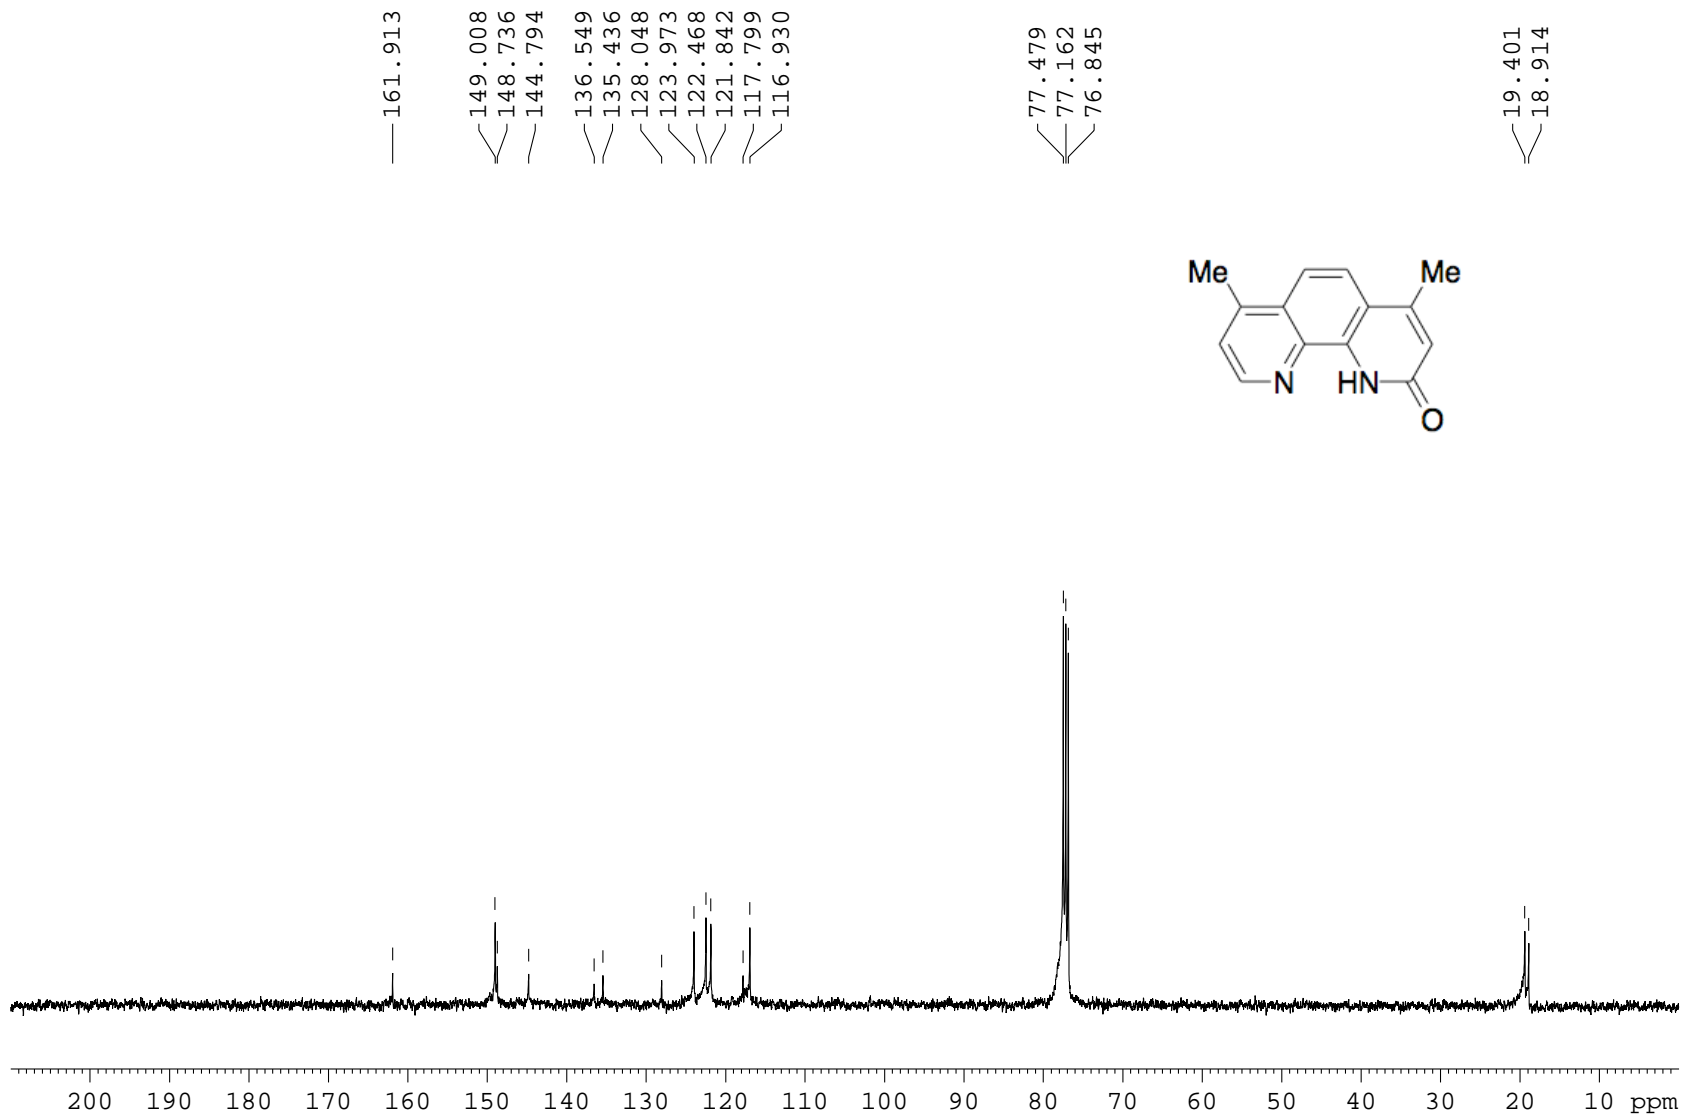

### 1,7-Phenanthrolin-8-one (15) <sup>1</sup>H NMR

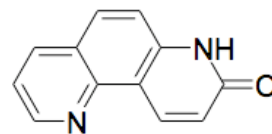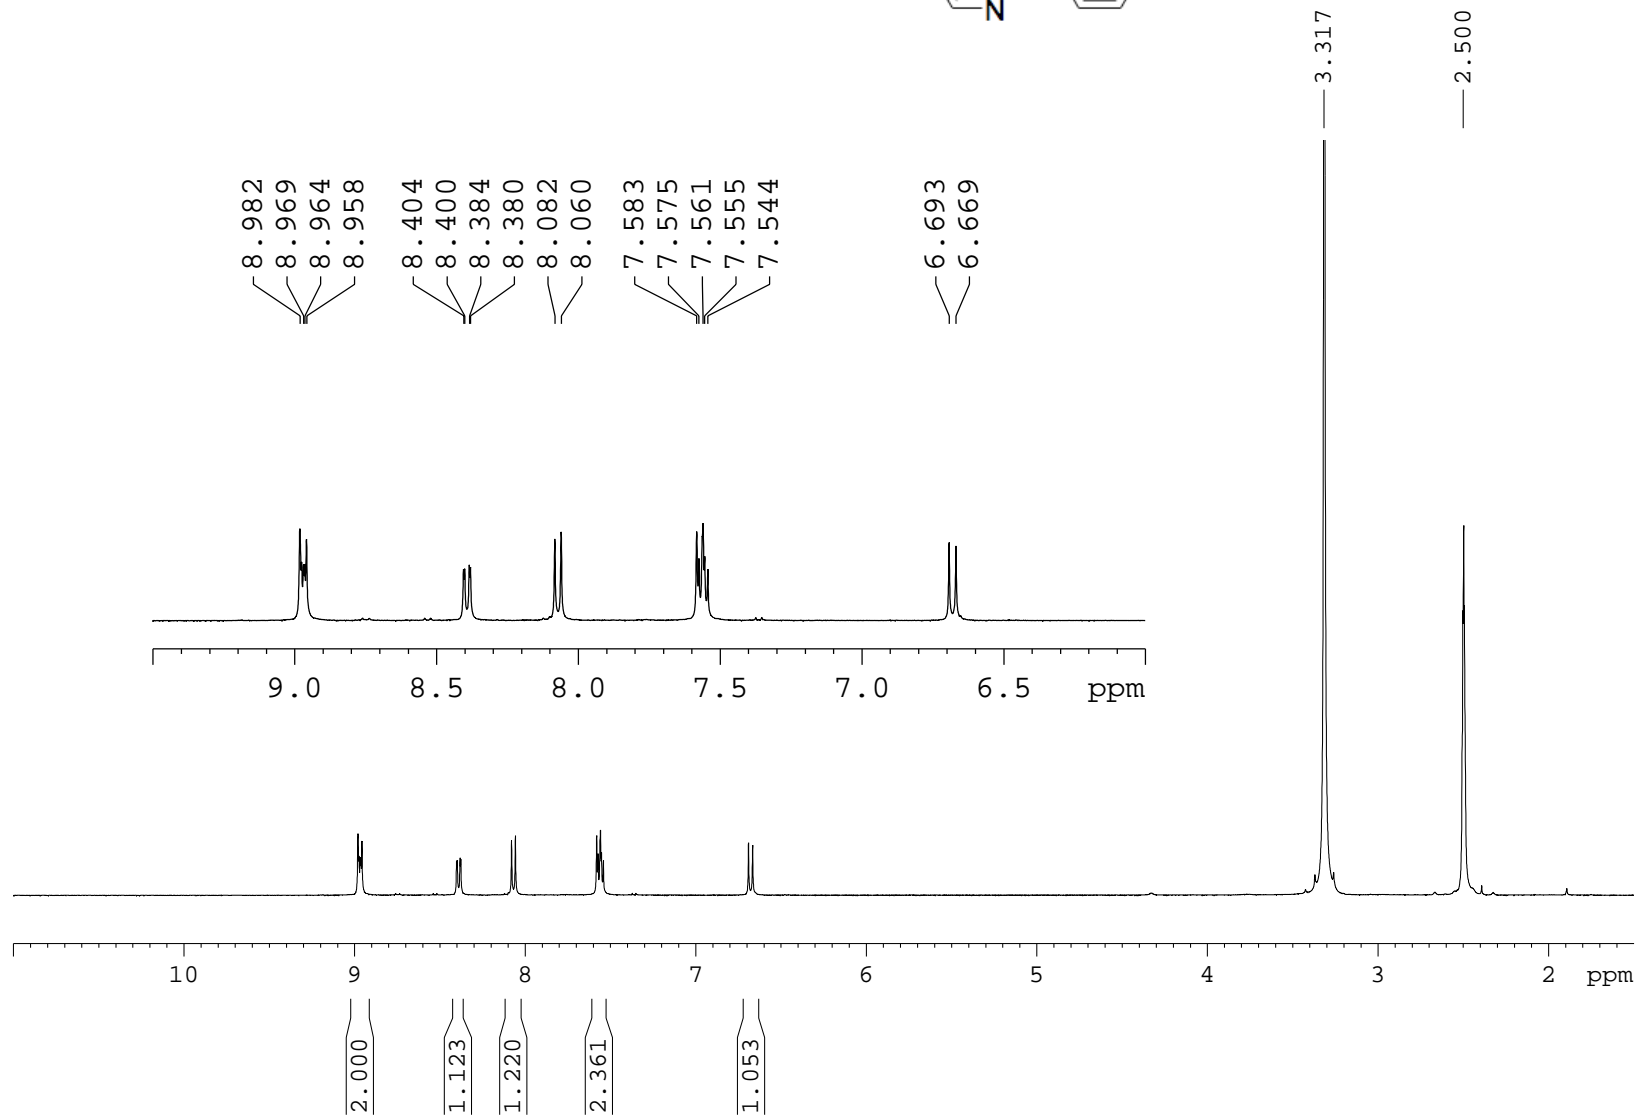

### 1,7-Phenanthroline-8-one (15) $^1\text{H}$ NMR

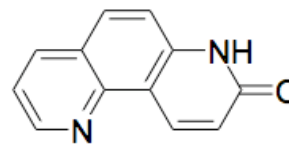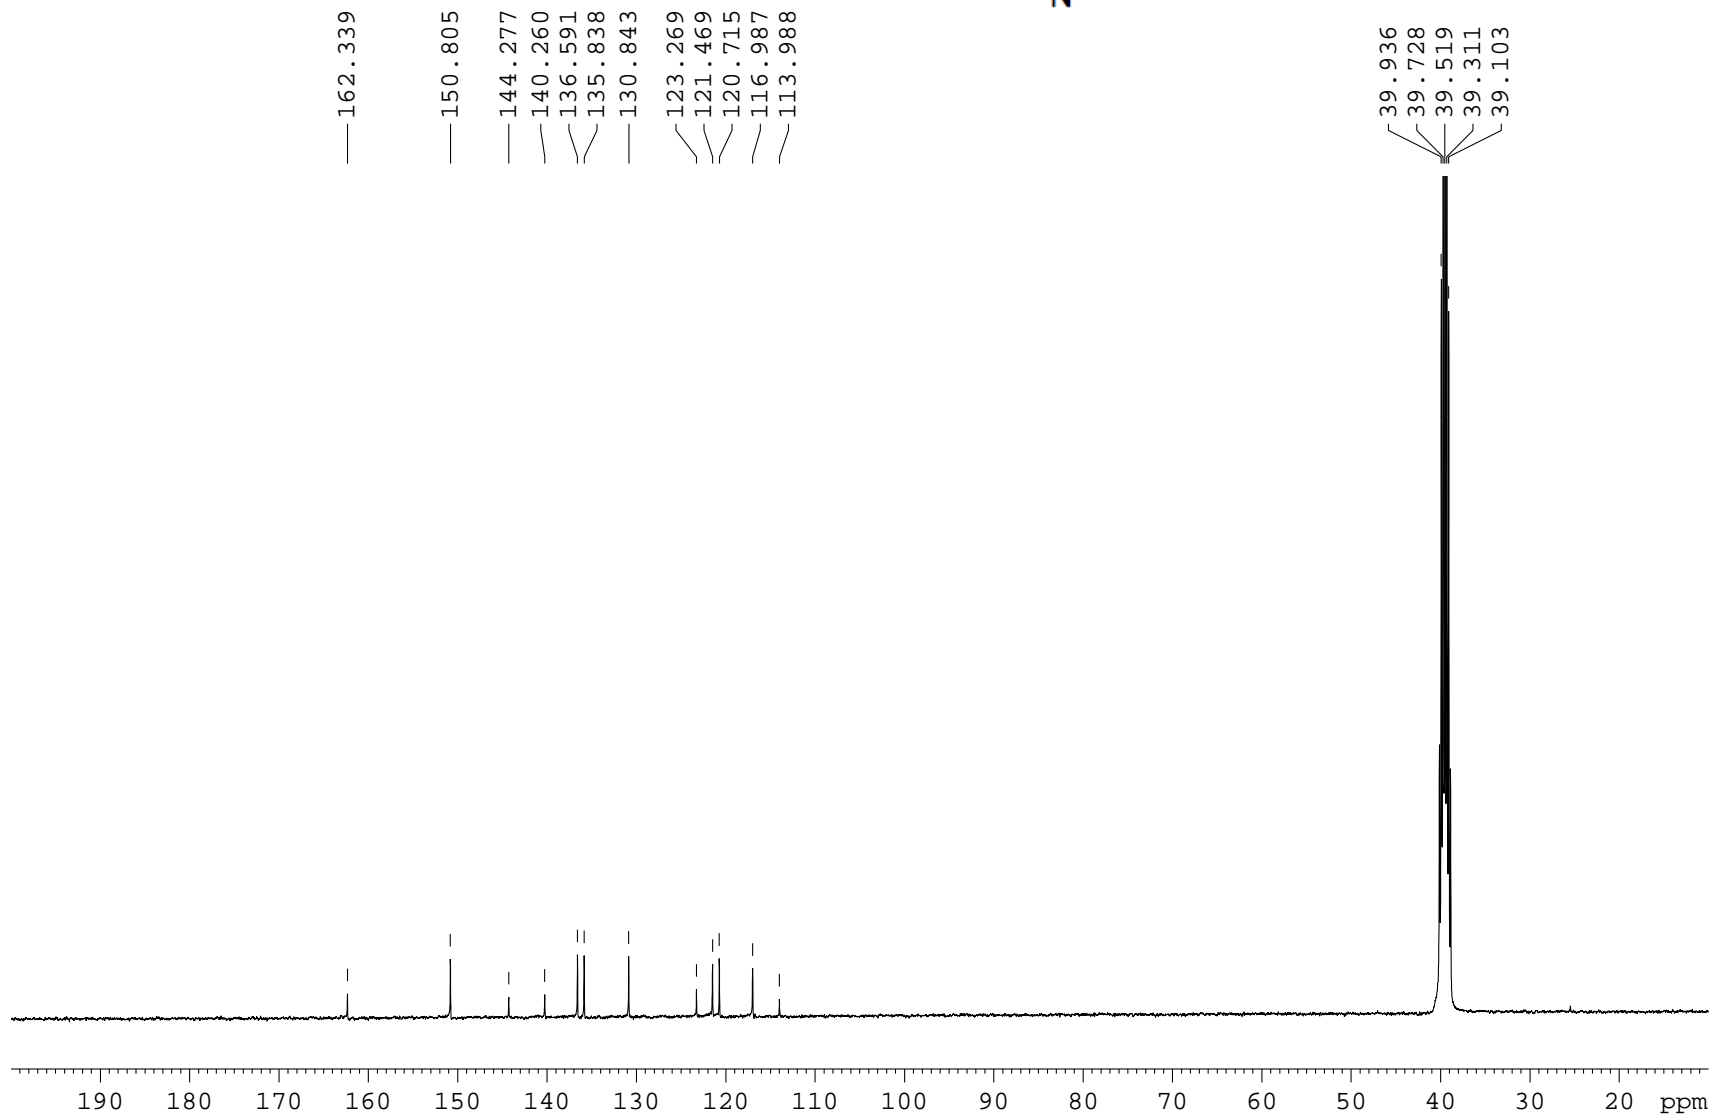

### 4,7-Phenanthroline-3,8(4H,7H)-dione (18) $^1\text{H}$ NMR

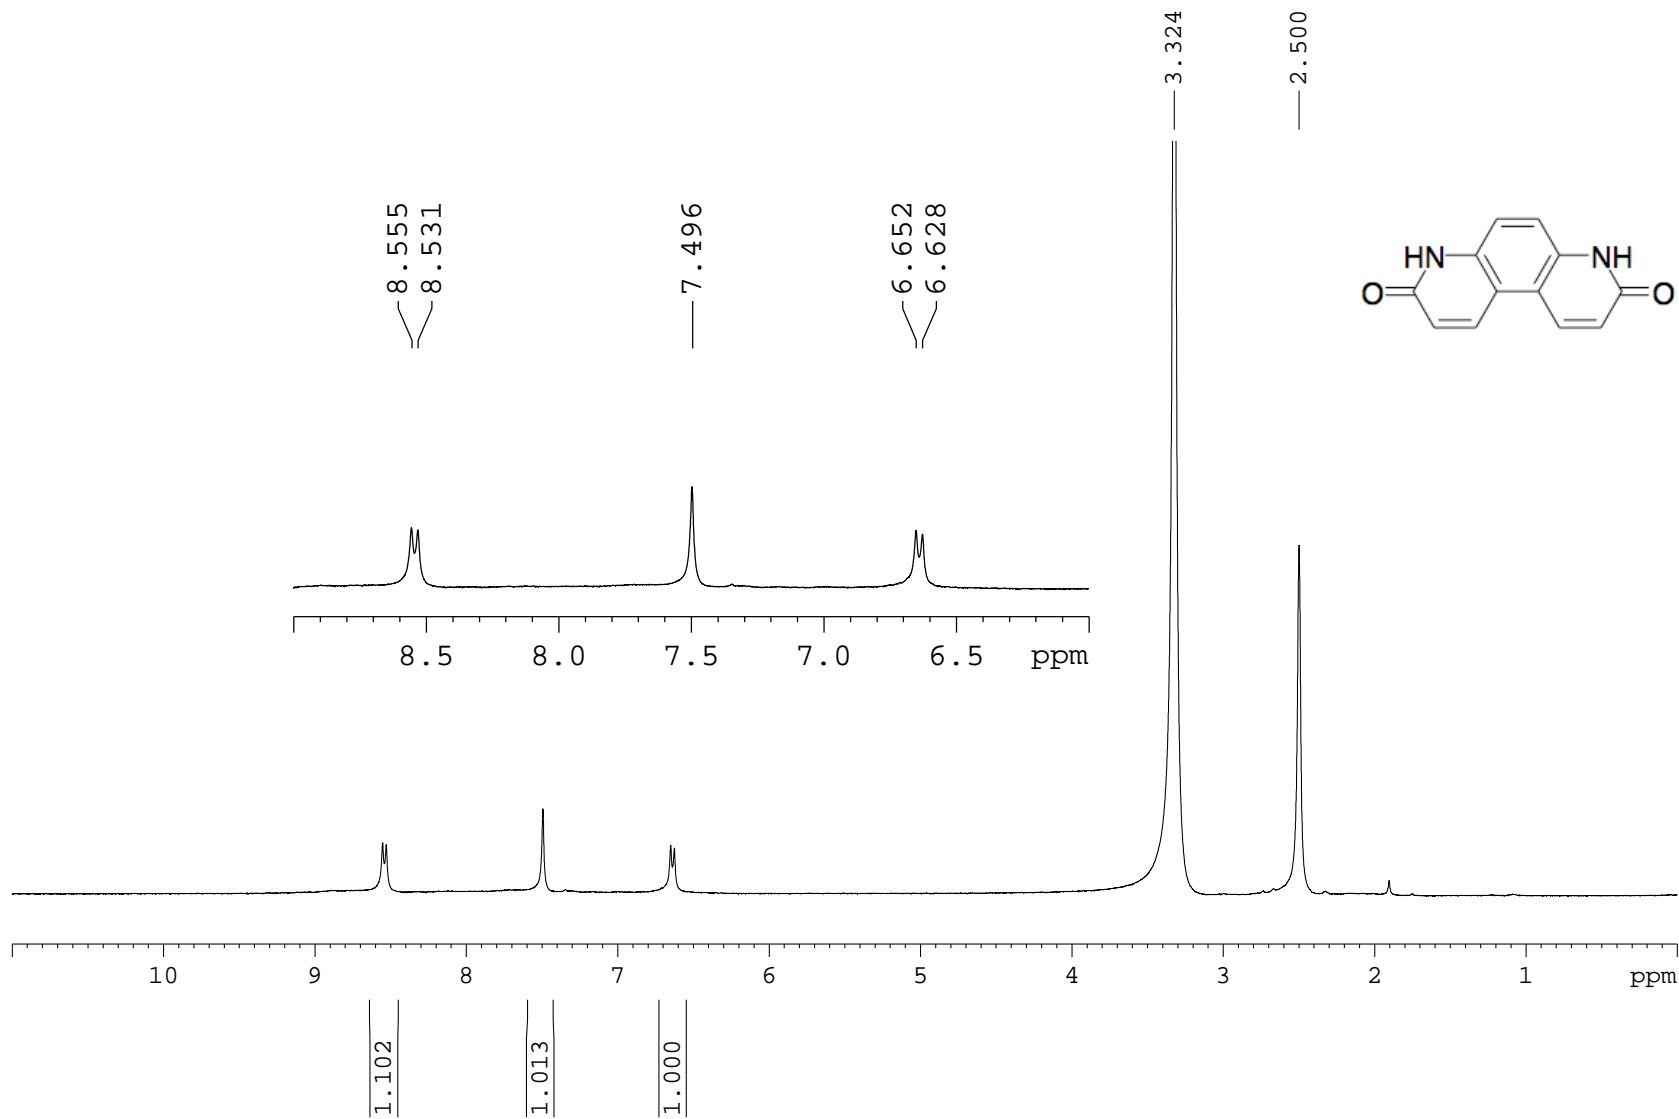

### 4,7-Phenanthroline-3,8(4H,7H)-dione (18) $^{13}\text{C}$ NMR

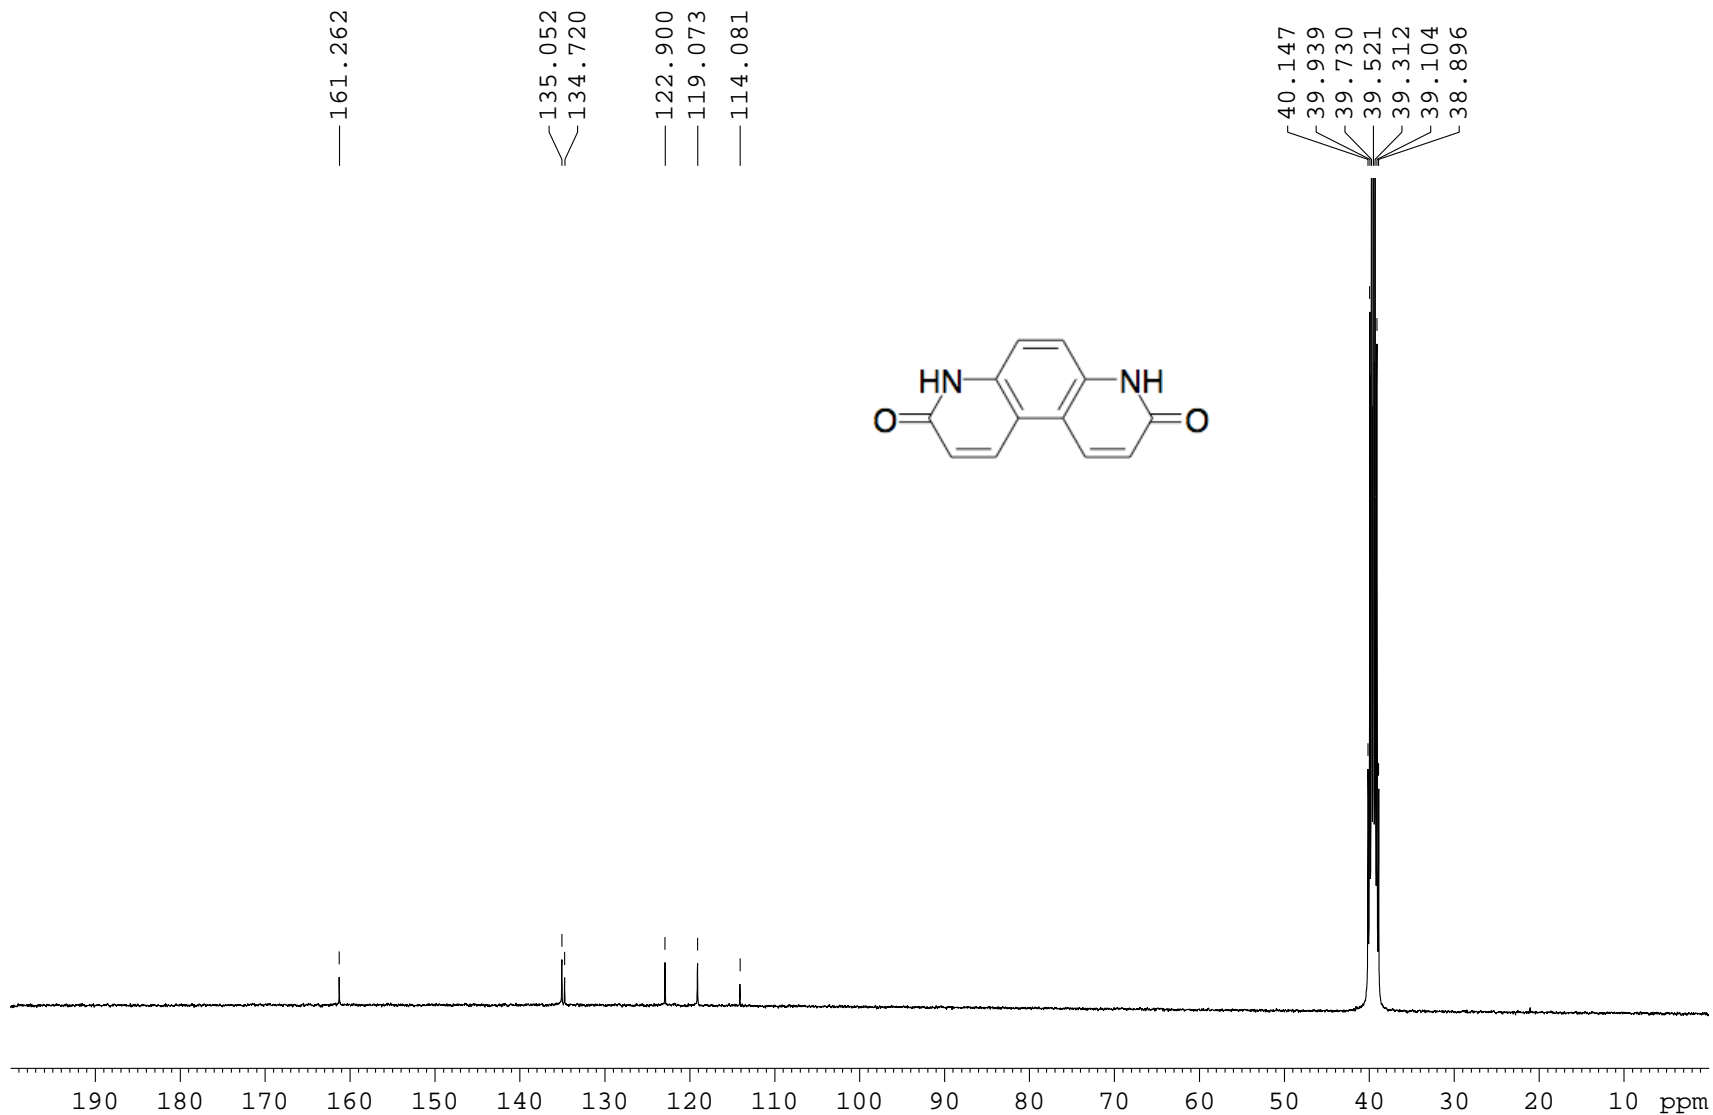

### 6,6''-Diacetoxy-4'-(4-chlorophenyl)-2,2':6',2''-terpyridine (23) <sup>1</sup>H NMR

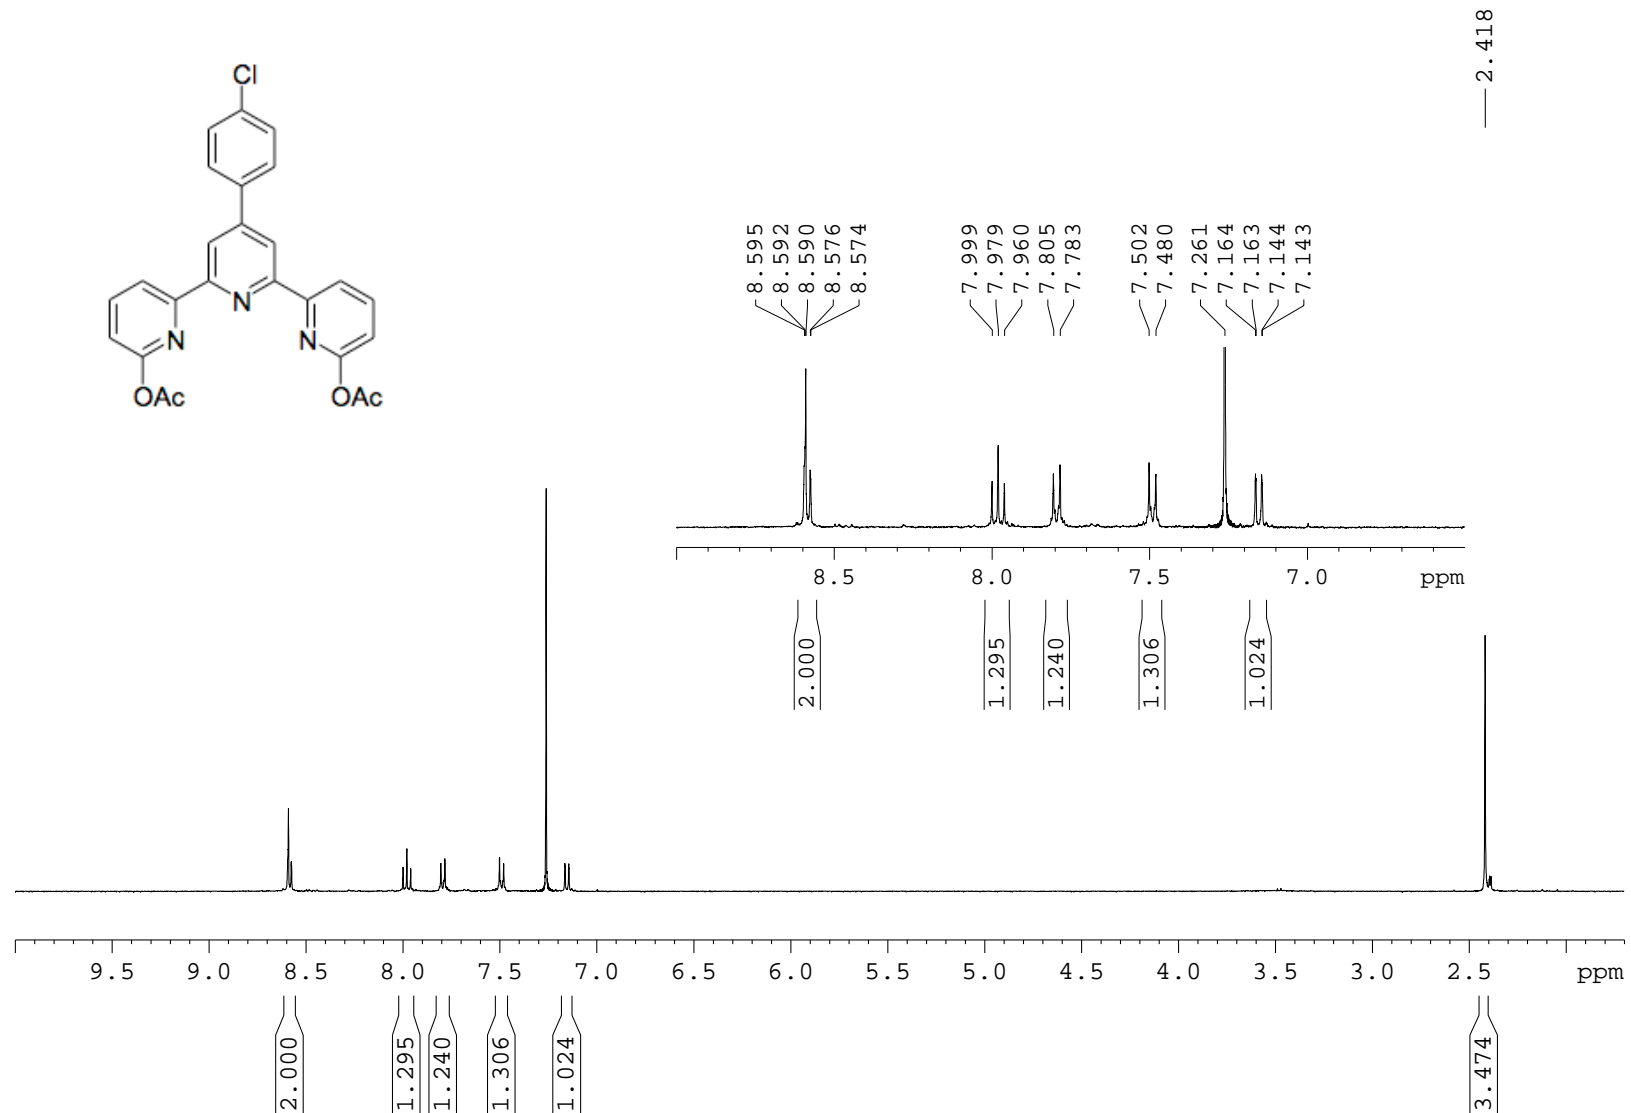

**6,6''-Diacetoxy-4'-(4-chlorophenyl)-2,2':6,2''-terpyridine (23)  $^{13}\text{C}$  NMR**

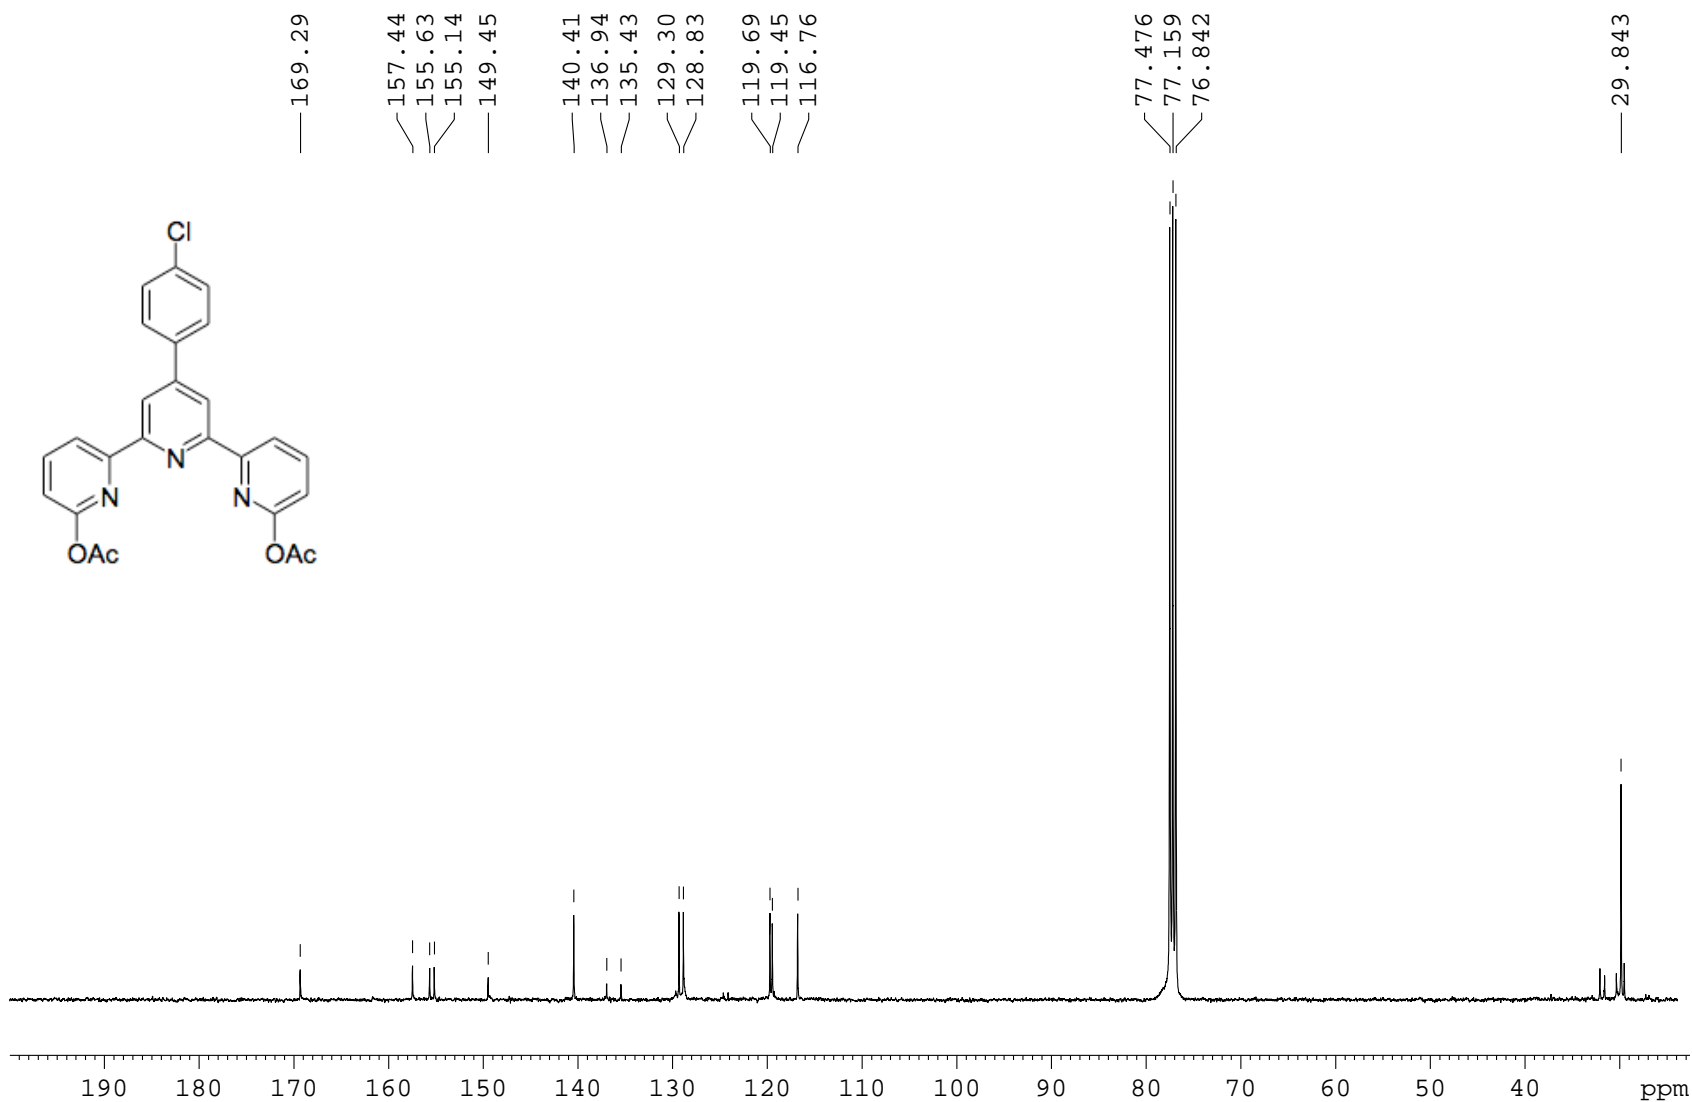

## DFT calculations

All calculations were performed using Gaussian 03 program.

5,6-Dimethyl-1,10-phenanthroline (**10**) - Standard basis: 6-31+G(d)

## Geometry

Standard orientation:

| -----            |                  |                |                         |           |           |  |
|------------------|------------------|----------------|-------------------------|-----------|-----------|--|
| Center<br>Number | Atomic<br>Number | Atomic<br>Type | Coordinates (Angstroms) |           |           |  |
|                  |                  |                | X                       | Y         | Z         |  |
| -----            |                  |                |                         |           |           |  |
| 1                | 6                | 0              | 3.473667                | -0.719465 | 0.000126  |  |
| 2                | 6                | 0              | 2.856249                | 0.519367  | -0.000018 |  |
| 3                | 6                | 0              | 1.429865                | 0.542279  | -0.000035 |  |
| 4                | 6                | 0              | 0.730670                | -0.701130 | -0.000018 |  |
| 5                | 6                | 0              | 2.688860                | -1.890209 | 0.000136  |  |
| 6                | 6                | 0              | 0.682338                | 1.766452  | -0.000019 |  |
| 7                | 6                | 0              | -0.730670               | -0.701130 | 0.000018  |  |
| 8                | 6                | 0              | -1.429865               | 0.542279  | 0.000035  |  |
| 9                | 6                | 0              | -0.682338               | 1.766452  | 0.000019  |  |
| 10               | 6                | 0              | -2.856249               | 0.519367  | 0.000018  |  |
| 11               | 6                | 0              | -3.473667               | -0.719465 | -0.000126 |  |
| 12               | 6                | 0              | -2.688860               | -1.890209 | -0.000136 |  |
| 13               | 1                | 0              | 1.214814                | 2.712565  | -0.000054 |  |
| 14               | 1                | 0              | 4.558248                | -0.797700 | 0.000244  |  |
| 15               | 1                | 0              | 3.173844                | -2.866222 | 0.000163  |  |
| 16               | 1                | 0              | -1.214814               | 2.712565  | 0.000054  |  |
| 17               | 1                | 0              | -4.558248               | -0.797700 | -0.000244 |  |
| 18               | 1                | 0              | -3.173844               | -2.866222 | -0.000163 |  |
| 19               | 7                | 0              | -1.367459               | -1.896286 | -0.000024 |  |



|    |   |   |           |           |           |
|----|---|---|-----------|-----------|-----------|
| 20 | 7 | 0 | 1.367459  | -1.896286 | 0.000024  |
| 21 | 6 | 0 | 3.669832  | 1.790740  | -0.000155 |
| 22 | 6 | 0 | -3.669832 | 1.790740  | 0.000155  |
| 23 | 1 | 0 | -4.740235 | 1.563998  | 0.000107  |
| 24 | 1 | 0 | -3.458106 | 2.406423  | 0.883524  |
| 25 | 1 | 0 | -3.458059 | 2.406735  | -0.882977 |
| 26 | 1 | 0 | 3.458106  | 2.406423  | -0.883524 |
| 27 | 1 | 0 | 4.740235  | 1.563998  | -0.000107 |
| 28 | 1 | 0 | 3.458059  | 2.406735  | 0.882977  |

---

### Energy

SCF Done: E(RB+HF-LYP) = -650.266478686 A.U. after 18 cycles  
Predicted change in Energy=-9.242895D-09

4,7-dimethyl-1,10-phenanthroline-2-yl ethanoate (**11**) - Standard basis: 6-31+G(d)

## Geometry

Standard orientation:

| Center<br>Number | Atomic<br>Number | Atomic<br>Type | Coordinates (Angstroms) |           |           |
|------------------|------------------|----------------|-------------------------|-----------|-----------|
|                  |                  |                | X                       | Y         | Z         |
| 1                | 6                | 0              | 3.730138                | -2.060425 | -0.020863 |
| 2                | 6                | 0              | 3.828274                | -0.686880 | 0.116573  |
| 3                | 6                | 0              | 2.618292                | 0.067257  | 0.055927  |
| 4                | 6                | 0              | 1.392217                | -0.635133 | -0.138869 |
| 5                | 6                | 0              | 2.466506                | -2.655880 | -0.212165 |
| 6                | 6                | 0              | 2.595532                | 1.495140  | 0.183324  |
| 7                | 6                | 0              | 0.143670                | 0.115847  | -0.199966 |
| 8                | 6                | 0              | 0.169097                | 1.534018  | -0.071749 |
| 9                | 6                | 0              | 1.425609                | 2.196068  | 0.120780  |
| 10               | 6                | 0              | -1.068934               | 2.243490  | -0.141938 |
| 11               | 6                | 0              | -2.223404               | 1.507169  | -0.328804 |
| 12               | 6                | 0              | -2.116982               | 0.108646  | -0.433729 |
| 13               | 1                | 0              | 3.528685                | 2.029325  | 0.332447  |
| 14               | 1                | 0              | 4.619160                | -2.685308 | 0.017404  |
| 15               | 1                | 0              | 2.389243                | -3.737408 | -0.321107 |
| 16               | 1                | 0              | 1.445673                | 3.276843  | 0.220298  |
| 17               | 1                | 0              | -3.197565               | 1.981970  | -0.388925 |
| 18               | 7                | 0              | 1.332011                | -1.981602 | -0.271082 |
| 19               | 7                | 0              | -1.008696               | -0.574417 | -0.380789 |
| 20               | 6                | 0              | 5.166959                | -0.021316 | 0.322943  |
| 21               | 6                | 0              | -1.129007               | 3.745639  | -0.014958 |

|    |   |   |           |           |           |
|----|---|---|-----------|-----------|-----------|
| 22 | 1 | 0 | 5.389904  | 0.695981  | -0.477019 |
| 23 | 1 | 0 | 5.969728  | -0.764545 | 0.338168  |
| 24 | 1 | 0 | 5.202396  | 0.529223  | 1.271544  |
| 25 | 1 | 0 | -2.161077 | 4.099745  | -0.092065 |
| 26 | 1 | 0 | -0.729663 | 4.082985  | 0.949621  |
| 27 | 1 | 0 | -0.543875 | 4.240114  | -0.800467 |
| 28 | 8 | 0 | -3.282708 | -0.622260 | -0.686976 |
| 29 | 6 | 0 | -3.969543 | -1.125792 | 0.390226  |
| 30 | 6 | 0 | -5.082136 | -2.028886 | -0.074804 |
| 31 | 1 | 0 | -5.719396 | -2.288770 | 0.771725  |
| 32 | 1 | 0 | -4.649956 | -2.941006 | -0.502143 |
| 33 | 1 | 0 | -5.670048 | -1.544683 | -0.860838 |
| 34 | 8 | 0 | -3.694060 | -0.862254 | 1.536087  |

---

### Energy

SCF Done: E(RB+HF-LYP) = -878.158421245 A.U. after 12 cycles  
Predicted change in Energy=-9.351624D-09

1,7-phenanthroline (**13**) - Standard basis: 6-31+G(d)

## Geometry

Standard orientation:

| Center<br>Number | Atomic<br>Number | Atomic<br>Type | Coordinates (Angstroms) |           |          |
|------------------|------------------|----------------|-------------------------|-----------|----------|
|                  |                  |                | X                       | Y         | Z        |
| 1                | 6                | 0              | -1.438198               | 3.149621  | 0.000000 |
| 2                | 6                | 0              | -1.422214               | 0.850740  | 0.000000 |
| 3                | 6                | 0              | 0.000000                | 0.811286  | 0.000000 |
| 4                | 6                | 0              | 0.693795                | 2.039607  | 0.000000 |
| 5                | 6                | 0              | -0.028398               | 3.217765  | 0.000000 |
| 6                | 6                | 0              | -2.168710               | -0.377587 | 0.000000 |
| 7                | 6                | 0              | 0.678263                | -0.471542 | 0.000000 |
| 8                | 6                | 0              | -0.098058               | -1.665633 | 0.000000 |
| 9                | 6                | 0              | -1.532005               | -1.582975 | 0.000000 |
| 10               | 6                | 0              | 0.595972                | -2.896207 | 0.000000 |
| 11               | 1                | 0              | 0.033415                | -3.827585 | 0.000000 |
| 12               | 6                | 0              | 1.977378                | -2.899024 | 0.000000 |
| 13               | 6                | 0              | 2.650173                | -1.659115 | 0.000000 |
| 14               | 1                | 0              | -3.251933               | -0.302486 | 0.000000 |
| 15               | 1                | 0              | -2.027635               | 4.065740  | 0.000000 |
| 16               | 1                | 0              | 1.778814                | 2.030318  | 0.000000 |
| 17               | 1                | 0              | 0.468478                | 4.183796  | 0.000000 |
| 18               | 1                | 0              | -2.103563               | -2.508673 | 0.000000 |
| 19               | 1                | 0              | 2.543028                | -3.826203 | 0.000000 |
| 20               | 1                | 0              | 3.738971                | -1.629737 | 0.000000 |
| 21               | 7                | 0              | -2.123883               | 2.016258  | 0.000000 |

22                    7                    0                    2.034229                    -0.485798                    0.000000

---

### Energy

SCF Done: E(RB+HF-LYP) = -571.638106299 A.U. after 11 cycles  
Predicted change in Energy=-5.392611D-05

1,7-phenanthroline-8-yl ethanoate (**14**) - Standard basis: 6-31+G(d)

**Geometry**

Standard orientation:

| Center<br>Number | Atomic<br>Number | Atomic<br>Type | Coordinates (Angstroms) |           |           |
|------------------|------------------|----------------|-------------------------|-----------|-----------|
|                  |                  |                | X                       | Y         | Z         |
| 1                | 6                | 0              | -4.864427               | -0.544373 | 0.193851  |
| 2                | 6                | 0              | -4.281264               | 0.707337  | 0.231795  |
| 3                | 6                | 0              | -2.878624               | 0.825735  | 0.110732  |
| 4                | 6                | 0              | -2.127195               | -0.374574 | -0.046154 |
| 5                | 6                | 0              | -4.028187               | -1.669472 | 0.033332  |
| 6                | 6                | 0              | -2.200731               | 2.090929  | 0.140047  |
| 7                | 6                | 0              | -0.685864               | -0.290915 | -0.171135 |
| 8                | 6                | 0              | -0.053846               | 0.980643  | -0.137637 |
| 9                | 6                | 0              | -0.844201               | 2.168609  | 0.020098  |
| 10               | 6                | 0              | 2.011957                | 0.041821  | -0.393448 |
| 11               | 6                | 0              | 1.500987                | -1.271814 | -0.441640 |
| 12               | 6                | 0              | 0.135889                | -1.429365 | -0.326843 |
| 13               | 1                | 0              | -2.794940               | 2.994028  | 0.261124  |
| 14               | 1                | 0              | -5.939227               | -0.672045 | 0.284043  |
| 15               | 1                | 0              | -4.885843               | 1.603610  | 0.353590  |
| 16               | 1                | 0              | -4.459401               | -2.668927 | -0.000866 |
| 17               | 1                | 0              | -0.321625               | 3.120005  | 0.041147  |
| 18               | 1                | 0              | 2.168829                | -2.117775 | -0.556514 |
| 19               | 1                | 0              | -0.324295               | -2.411219 | -0.354064 |
| 20               | 7                | 0              | -2.710239               | -1.598033 | -0.083098 |
| 21               | 7                | 0              | 1.294920                | 1.125664  | -0.250465 |

|    |   |   |          |           |           |
|----|---|---|----------|-----------|-----------|
| 22 | 8 | 0 | 3.376160 | 0.261412  | -0.590772 |
| 23 | 8 | 0 | 3.950835 | -0.826205 | 1.324009  |
| 24 | 6 | 0 | 5.675709 | 0.168849  | -0.060764 |
| 25 | 1 | 0 | 6.384080 | -0.273706 | 0.640847  |
| 26 | 1 | 0 | 5.888335 | -0.171794 | -1.079404 |
| 27 | 1 | 0 | 5.778233 | 1.259699  | -0.052795 |
| 28 | 6 | 0 | 4.272650 | -0.209568 | 0.336422  |

---

### Energy

SCF Done: E(RB+HF-LYP) = -799.529022794 A.U. after 17 cycles

Predicted change in Energy=-1.171799D-08

4,7-phenanthroline (**16**) - Standard basis: 6-31+G(d)

## Geometry

Standard orientation:

| Center<br>Number | Atomic<br>Number | Atomic<br>Type | Coordinates (Angstroms) |           |           |
|------------------|------------------|----------------|-------------------------|-----------|-----------|
|                  |                  |                | X                       | Y         | Z         |
| 1                | 6                | 0              | 0.000000                | 3.478822  | -0.194717 |
| 2                | 6                | 0              | 0.000000                | 1.422037  | 0.838979  |
| 3                | 6                | 0              | 0.000000                | 0.726767  | -0.406242 |
| 4                | 6                | 0              | 0.000000                | 1.515533  | -1.577803 |
| 5                | 6                | 0              | 0.000000                | 2.894178  | -1.477479 |
| 6                | 6                | 0              | 0.000000                | 0.680879  | 2.070066  |
| 7                | 6                | 0              | 0.000000                | -0.726767 | -0.406242 |
| 8                | 6                | 0              | 0.000000                | -1.422037 | 0.838979  |
| 9                | 6                | 0              | 0.000000                | -0.680879 | 2.070066  |
| 10               | 6                | 0              | 0.000000                | -3.478822 | -0.194717 |
| 11               | 6                | 0              | 0.000000                | -2.894178 | -1.477479 |
| 12               | 6                | 0              | 0.000000                | -1.515533 | -1.577803 |
| 13               | 1                | 0              | 0.000000                | 1.253996  | 2.992335  |
| 14               | 1                | 0              | 0.000000                | 4.562547  | -0.086994 |
| 15               | 1                | 0              | 0.000000                | 1.049259  | -2.558424 |
| 16               | 1                | 0              | 0.000000                | 3.521770  | -2.364045 |
| 17               | 1                | 0              | 0.000000                | -1.253996 | 2.992335  |
| 18               | 1                | 0              | 0.000000                | -4.562547 | -0.086994 |
| 19               | 1                | 0              | 0.000000                | -3.521770 | -2.364045 |
| 20               | 1                | 0              | 0.000000                | -1.049259 | -2.558424 |
| 21               | 7                | 0              | 0.000000                | 2.778564  | 0.928614  |



22                    7                    0                    0.000000                    -2.778564                    0.928614

---

### Energy

SCF Done: E(RB+HF-LYP) = -571.634642553 A.U. after 11 cycles

Predicted change in Energy=-9.526620D-08

4,7-phenanthroline-3-yl ethanoate - Standard basis: 6-31+G(d)

## Geometry

Standard orientation:

| Center<br>Number | Atomic<br>Number | Atomic<br>Type | Coordinates (Angstroms) |           |           |
|------------------|------------------|----------------|-------------------------|-----------|-----------|
|                  |                  |                | X                       | Y         | Z         |
| 1                | 6                | 0              | 4.877055                | -0.373803 | 0.179556  |
| 2                | 6                | 0              | 2.891780                | 0.788215  | 0.106124  |
| 3                | 6                | 0              | 2.126307                | -0.405674 | -0.048717 |
| 4                | 6                | 0              | 2.842084                | -1.623314 | -0.082448 |
| 5                | 6                | 0              | 4.219281                | -1.612385 | 0.031435  |
| 6                | 6                | 0              | 2.226870                | 2.060378  | 0.150530  |
| 7                | 6                | 0              | 0.682335                | -0.309228 | -0.161223 |
| 8                | 6                | 0              | 0.065780                | 0.973045  | -0.110820 |
| 9                | 6                | 0              | 0.871264                | 2.150274  | 0.046500  |
| 10               | 6                | 0              | -2.026606               | 0.081062  | -0.353116 |
| 11               | 6                | 0              | -1.540516               | -1.239887 | -0.422084 |
| 12               | 6                | 0              | -0.176838               | -1.421121 | -0.321909 |
| 13               | 1                | 0              | 2.850547                | 2.941024  | 0.270617  |
| 14               | 1                | 0              | 5.961624                | -0.337631 | 0.270943  |
| 15               | 1                | 0              | 2.320847                | -2.569033 | -0.195983 |
| 16               | 1                | 0              | 4.791342                | -2.535463 | 0.008773  |
| 17               | 1                | 0              | 0.356387                | 3.105575  | 0.079306  |
| 18               | 1                | 0              | -2.219806               | -2.075665 | -0.538020 |
| 19               | 1                | 0              | 0.224399                | -2.428434 | -0.369536 |
| 20               | 7                | 0              | -1.280464               | 1.143913  | -0.206852 |
| 21               | 7                | 0              | 4.246738                | 0.789113  | 0.217077  |

|    |   |   |           |           |           |
|----|---|---|-----------|-----------|-----------|
| 22 | 8 | 0 | -3.384098 | 0.344605  | -0.531640 |
| 23 | 6 | 0 | -4.310244 | -0.229679 | 0.304059  |
| 24 | 6 | 0 | -5.695621 | 0.229662  | -0.067922 |
| 25 | 1 | 0 | -5.778070 | 1.311234  | 0.086645  |
| 26 | 1 | 0 | -6.428878 | -0.288852 | 0.551207  |
| 27 | 1 | 0 | -5.889487 | 0.035866  | -1.127987 |
| 28 | 8 | 0 | -4.024703 | -0.981489 | 1.205725  |

---

### Energy

SCF Done: E(RB+HF-LYP) = -799.525554659 A.U. after 13 cycles

Predicted change in Energy=-1.802950D-08
